# Supplementary material
Source: publisher site journal article supplement (https://www.spandidos-publications.com/6437/downloadSupplementary)
Supplement: Supplementary file 1 [file downloadSupplementary]

Table SI. Primer sequences of rat used in RT-qPCR analysis.

| Gene           | Sequence (5'-3')                                                     |
|----------------|----------------------------------------------------------------------|
| miR-25-3p      | Sense:ACATTGGCCATTGCACTTGTCTC<br>Antisense:ATCCAGTGCAGGGTCCGAGG      |
| IL-1 $\beta$   | Forward:TACCTATGTCTTGCCCGTGGA<br>Reverse:ATCATCCCACGAGTCACAGAGG      |
| IL-6           | Forward:ACTTCACAAGTCGGAGGCTT<br>Reverse:AGTGCATCATCGCTGTTCAT         |
| IL-10          | Forward:GGTTGCCAAGCCTTATCGGAAATG<br>Reverse:GCCGCATCCTGAGGGTCTTC     |
| Arg-1          | Forward: CTGAAGTGGACAAGCTGGGAATT<br>Reverse: CCTGAAAGTAGCCCTGTCTTGTA |
| U6             | Forward:CTCGCTTCGGCAGCACATATACT<br>Reverse:ACGCTTCACGAATTTGCGTGTC    |
| $\beta$ -actin | Forward: TGTCACCAACTGGGACGATA<br>Reverse: GGGGTGTTGAAGGTCTCAA        |

IL, interleukin; Arg-1, arginase 1.

Table SII. Primer sequences of mouse used in RT-qPCR analysis.

| Gene           | Sequence (5'-3')                                                      |
|----------------|-----------------------------------------------------------------------|
| miR-25-3p      | Sense: ACATTGGCCATTGCACTTGTCTC<br>Antisense: ATCCAGTGCAGGGTCCGAGG     |
| IL-6           | Forward: AGTTGCCTTCTTGGGACTGA<br>Reverse: TCCACGATTTCCCAGAGAAC        |
| iNOS           | Forward: TGATGTGCTGCCTCTGGTCTTG<br>Reverse: GCTCCTGGAACCACTCGTACTTG   |
| IL-10          | Forward: GGTGCCAAGCCTTATCGGAAATG<br>Reverse: GCCGCATCCTGAGGGTCTTC     |
| Arg1           | Forward: GAAGACAGCAGAGGAGGTGAAGAG<br>Reverse: GTTGAGTTCCGAAGCAAGCCAAG |
| U6             | Forward: CTCGCTTCGGCAGCACATATACT<br>Reverse: ACGCTTCACGAATTTGCGTGTC   |
| $\beta$ -actin | Forward: GTGACGTTGACATCCGTAAAGA<br>Reverse: GCCGGACTCATCGTACTCC       |

IL, interleukin; Arg-1, arginase 1; iNOS, inducible nitric oxide synthase.
